# Supplementary material
Source: PubMed Central journal article supplement (PMC4690809)
Supplement: NIHMS733631-supplement-Supplementary_Tables.pdf [file NIHMS733631-supplement-Supplementary_Tables.pdf]

## **Supplementary Materials**

### **Allergic lung inflammation aggravates angiotensin II-induced abdominal aortic aneurysms in mice**

Cong-Lin Liu, Yi Wang, Mengyang Liao, Holger Wemmelund, Jingyuan Ren, Cleveson Fernandes, Yi Zhou, Galina K. Sukhova, Jes S. Lindholt, Søren P. Johnsen, Jin-Ying Zhang, Xiang Cheng, Xiaozhu Huang, Alan Daugherty, Bruce D. Levy, Peter Libby, Guo-Ping Shi

## **Supplementary Tables**

**Supplementary Table I.** Production of allergic lung inflammation (ALI) at the same time or before AAA formation enhanced AAA progression in *Apoe*<sup>-/-</sup> mice.

| Variable                                | ALI and AAA at the same time |               | P value | ALI first, then AAA |               | P value |
|-----------------------------------------|------------------------------|---------------|---------|---------------------|---------------|---------|
|                                         | OVA (n=13)                   | Saline (n=11) |         | OVA (n=14)          | Saline (n=12) |         |
| <b>Anthropometric parameters</b>        |                              |               |         |                     |               |         |
| Body weight-beginning (g)               | 26.50±0.81                   | 25.02±0.87    | 0.226   | 22.90±0.45          | 23.36±0.43    | 0.213   |
| Body weight-end (g)                     | 29.43±0.48                   | 29.47±0.76    | 0.959   | 30.19±0.46          | 30.93±0.27    | 0.181   |
| SBP-beginning (mmHg)                    | 102.07±3.17                  | 98.27±2.38    | 0.348   | 101.67±3.95         | 103.75±2.55   | 0.673   |
| SBP-end (mmHg)                          | 125.69±3.96                  | 120.64±5.97   | 0.494   | 124.42±4.88         | 118.58±4.07   | 0.075   |
| DBP-beginning (mmHg)                    | 77.57±3.20                   | 71.45±2.81    | 0.164   | 77.75±2.43          | 75.83±3.50    | 0.555   |
| DBP-end (mmHg)                          | 95.62±3.41                   | 89.73±4.05    | 0.286   | 99.83±4.57          | 92.17±3.80    | 0.035   |
| <b>AAA lesion analysis</b>              |                              |               |         |                     |               |         |
| AAA size (mm)                           | 4.34±0.46                    | 2.31±0.21     | 0.001   | 3.07±0.32           | 1.95±0.24     | 0.006   |
| Mortality (%)                           | 7.14%                        | 8.33%         | 1.000   | 6.67%               | 0%            | 1.000   |
| AAA incidence (%)                       | 100%                         | 100%          | 1.000   | 92%                 | 100%          | 1.000   |
| Area (mm <sup>2</sup> )                 | 1.67±0.28                    | 0.69±0.23     | 0.036   | 1.09±0.11           | 0.51±0.05     | 0.033   |
| Macrophage (%)                          | 11.85±1.54                   | 7.75±0.78     | 0.044   | 10.48±1.53          | 5.12±0.91     | 0.007   |
| Mast cell (# per section)               | 24.42±3.84                   | 9.89±1.32     | 0.011   | 14.75±2.27          | 4.27±1.29     | <0.001  |
| CD4 <sup>+</sup> T-cell (# per section) | 34.00±4.93                   | 30.45±4.94    | 0.673   | 35.67±8.08          | 24.27±8.99    | 0.368   |
| CD8 <sup>+</sup> T-cell (# per section) | 22.67±4.02                   | 23.55±2.51    | 0.878   | 23.25±3.95          | 26.75±7.75    | 0.692   |
| MHC-II (% area)                         | 0.73±0.12                    | 1.18±0.46     | 0.411   | 1.56±0.53           | 0.73±0.32     | 0.199   |
| SMC loss (grade)                        | 3.45±0.11                    | 2.14±0.11     | <0.001  | 2.35±0.11           | 1.94±0.09     | 0.010   |
| Collagen (grade)                        | 3.01±0.24                    | 3.23±0.21     | 0.494   | 2.83±0.26           | 2.43±0.31     | 0.331   |
| Elastin frag. (grade)                   | 2.46±0.17                    | 2.19±0.19     | 0.324   | 1.74±0.15           | 1.71±0.09     | 0.863   |
| Ki67 <sup>+</sup> cell (# per section)  | 67.46±14.94                  | 26.91±5.90    | 0.047   | 16.25±4.40          | 11.83±4.30    | 0.480   |
| Microvessel (# per section)             | 76.33±13.83                  | 14.91±4.35    | 0.004   | 19.00±5.20          | 12.33±5.88    | 0.405   |
| TUNEL <sup>+</sup> cell (# per section) | 85.50±9.96                   | 75.73±13.36   | 0.609   | 64.00±4.05          | 65.09±9.80    | 0.922   |
| <b>Plasma lipid proteins</b>            |                              |               |         |                     |               |         |
| Total cholesterol (mg/dL)               | 189.71±11.08                 | 174.05±13.10  | 0.367   | 268.16±12.17        | 249.82±6.93   | 0.207   |
| LDL (mg/dL)                             | 73.38±20.01                  | 112.44±45.32  | 0.427   | 50.85±13.42         | 69.66±14.08   | 0.344   |
| HDL (mg/dL)                             | 101.43±31.38                 | 86.61±25.41   | 0.718   | 172.07±24.39        | 115.17±13.17  | 0.056   |
| Triglyceride (mg/dL)                    | 164.52±25.42                 | 182.78±23.37  | 0.612   | 362.55±38.51        | 326.23±13.07  | 0.387   |
| <b>Plasma inflammatory proteins</b>     |                              |               |         |                     |               |         |
| IgE (µg/mL)                             | 0.93±0.14                    | 0.35±0.09     | 0.004   | 0.92±0.11           | 0.42±0.08     | 0.001   |
| IFN-γ (pg/mL)                           | 75.60±12.04                  | 57.05±8.76    | 0.328   | 1.78±1.63           | 16.21±6.98    | 0.139   |
| TNF-α (pg/mL)                           | 19.12±1.61                   | 18.10±1.59    | 0.658   | 54.53±27.05         | 67.67±35.65   | 0.768   |
| Eotaxin (pg/mL)                         | 66.52±7.08                   | 64.22±5.02    | 0.797   | 234.62±12.56        | 231.28±12.37  | 0.858   |
| MCP-1 (pg/mL)                           | 81.71±5.42                   | 83.80±7.70    | 0.828   | 146.59±8.37         | 169.58±19.68  | 0.326   |
| IL4 (pg/mL)                             | 43.87±8.55                   | 47.27±15.59   | 0.851   | 22.88±12.36         | 31.72±7.93    | 0.567   |
| IL5 (pg/mL)                             | 5.19±0.58                    | 10.86±2.13    | 0.044   | 6.09±2.68           | 28.97±5.71    | 0.002   |
| IL13 (pg/mL)                            | 2.50±0.32                    | 1.57±0.26     | 0.050   | 1.62±0.96           | 15.36±4.89    | 0.019   |
| TGF-β (ng/mL)                           | 7.03±0.72                    | 6.44±0.85     | 0.605   | 3.28±0.96           | 6.80±1.29     | 0.050   |
| <b>BALF cell typing</b>                 |                              |               |         |                     |               |         |
| Total Cell in BALF (x10 <sup>4</sup> )  | 52.75±7.30                   | 15.71±7.05    | 0.031   | 5.94±1.60           | 3.54±0.59     | 0.147   |
| Macrophage (%)                          | 26.67±4.45                   | 89.00±2.89    | <0.001  | 75.42±5.55          | 96.00±0.51    | 0.018   |
| Lymphocyte (%)                          | 30.83±3.91                   | 9.83±2.37     | 0.015   | 14.42±2.53          | 2.50±0.60     | 0.002   |
| Eosinophil (%)                          | 40.83±4.35                   | 0.83±0.61     | 0.001   | 8.25±2.12           | 1.08±0.50     | 0.026   |
| Neutrophil (%)                          | 1.67±0.69                    | 0.33±0.16     | 0.266   | 1.83±1.27           | 0.50±0.29     | 0.446   |
| <b>BALF proteins</b>                    |                              |               |         |                     |               |         |
| IgE (ng/mL)                             | 214.11±28.22                 | 142.30±34.31  | 0.138   | 84.01±11.32         | 107.97±12.24  | 0.164   |
| IFN-γ (pg/mL)                           | 11.27±1.66                   | 12.39±3.21    | 0.766   | 7.45±1.17           | 6.73±1.87     | 0.750   |
| TNF-α (pg/mL)                           | 317.57±58.01                 | 212.18±15.62  | 0.132   | 121.42±13.19        | 169.95±19.36  | 0.052   |
| Eotaxin (pg/mL)                         | 49.57±8.62                   | 32.12±1.43    | 0.099   | 26.79±2.61          | 34.09±3.52    | 0.112   |
| MCP-1 (pg/mL)                           | 67.84±10.39                  | 50.11±5.72    | 0.174   | 33.02±4.75          | 46.28±5.01    | 0.068   |
| IL4 (pg/mL)                             | 1.71±0.55                    | 2.08±0.41     | 0.606   | 1.38±0.33           | 2.45±0.54     | 0.110   |
| IL5 (pg/mL)                             | 4.66±1.41                    | 3.15±1.32     | 0.453   | 0.55±0.21           | 0.57±0.22     | 0.932   |
| IL13 (pg/mL)                            | 105.03±9.01                  | 89.24±5.24    | 0.168   | 70.94±3.27          | 83.81±4.14    | 0.023   |
| TGF-β (pg/mL)                           | 100.49±34.93                 | 40.27±18.58   | 0.168   | 108.88±21.45        | 85.56±19.56   | 0.431   |

**Supplementary Table II.** Production of allergic lung inflammation (ALI) after AAA formation enhanced AAA progression in *ApoE*<sup>-/-</sup> mice.

| Variable                                | ALI only     |              | P value | AAA first, then ALI |               | P value |
|-----------------------------------------|--------------|--------------|---------|---------------------|---------------|---------|
|                                         | OVA (n=8)    | Saline (n=8) |         | OVA (n=10)          | Saline (n=10) |         |
| <b>Anthropometric parameters</b>        |              |              |         |                     |               |         |
| Body weight-1 (g)                       | 27.71±0.31   | 27.93±0.41   | 0.685   | 27.34±1.30          | 27.46±1.04    | 0.947   |
| Body weight-2 (g)                       | 32.64±0.41   | 32.19±0.81   | 0.631   | 32.83±0.97          | 32.10±0.63    | 0.536   |
| SBP-1 (mmHg)                            | 108.25±2.12  | 110.13±4.01  | 0.687   | 102.89±5.74         | 102.89±3.18   | 1.000   |
| SBP-2 (mmHg)                            | 108.38±2.38  | 109.63±3.47  | 0.772   | 146.25±9.39         | 137.11±7.23   | 0.471   |
| DBP-1 (mmHg)                            | 89.50±2.94   | 86.00±4.37   | 0.519   | 76.89±4.75          | 75.00±3.21    | 0.746   |
| DBP-2 (mmHg)                            | 89.00±2.70   | 88.25±3.44   | 0.866   | 110.13±8.41         | 97.33±6.97    | 0.278   |
| <b>AAA lesion analysis</b>              |              |              |         |                     |               |         |
| AAA size (mm)                           | 1.00±0.05    | 1.03±0.05    | 0.727   | 2.71±0.42           | 1.49±0.14     | 0.020   |
| Mortality (%)                           | 0            | 0            | 1.000   | 28.57%              | 16.67%        | 0.562   |
| AAA incidence (%)                       | 0            | 0            | N/A     | 80%                 | 90%           | 0.999   |
| Area (mm <sup>2</sup> )                 | 0.09±0.01    | 0.08±0.01    | 0.573   | 1.92±0.48           | 0.75±0.21     | 0.041   |
| Macrophage (% area)                     | 3.31±0.27    | 3.05±0.70    | 0.734   | 11.59±0.99          | 12.32±1.02    | 0.659   |
| Mast cell (# per section)               | 0.75±0.53    | 1.25±0.75    | 0.594   | 61.00±11.93         | 16.33±4.30    | 0.012   |
| CD4 <sup>+</sup> T-cell (# per section) | 0.13±0.13    | 1.75±0.86    | 0.102   | 93.56±16.15         | 31.67±10.06   | 0.014   |
| CD8 <sup>+</sup> T-cell (# per section) | 0.00±0.00    | 0.38±0.08    | 0.083   | 54.78±7.34          | 18.33±7.99    | 0.010   |
| MHC-II (% area)                         | 0.04±0.01    | 0.12±0.05    | 0.321   | 1.15±0.17           | 1.42±0.41     | 0.553   |
| SMC loss (grade)                        | 1.1±0.01     | 1.2±0.01     | 0.999   | 3.09±0.10           | 1.97±0.18     | <0.001  |
| Collagen (grade)                        | 1.70±0.58    | 3.42±0.15    | 0.020   | 1.56±0.13           | 2.97±0.22     | <0.001  |
| Elastin frag. (grade)                   | 1.57±0.06    | 1.54±0.08    | 0.745   | 2.84±0.15           | 2.71±0.19     | 0.594   |
| Ki67 <sup>+</sup> cell (# per section)  | 1.75±0.53    | 1.38±0.32    | 0.555   | 62.22±14.38         | 19.00±7.19    | 0.038   |
| Microvessel (# per section)             | 1.25±0.65    | 2.00±0.41    | 0.356   | 58.89±18.24         | 24.22±9.55    | 0.159   |
| TUNEL <sup>+</sup> cell (# per section) | 1.75±0.80    | 3.13±1.11    | 0.332   | 92.78±10.88         | 61.22±3.17    | 0.038   |
| <b>Plasma lipid proteins</b>            |              |              |         |                     |               |         |
| Total cholesterol (mg/dL)               | 218.70±13.81 | 296.98±24.72 | 0.017   | 230.82±5.81         | 271.56±50.21  | 0.446   |
| LDL (mg/dL)                             | 181.56±52.64 | 168.96±31.49 | 0.846   | 95.41±21.62         | 153.09±40.13  | 0.232   |
| HDL (mg/dL)                             | 84.68±38.71  | 86.22±21.94  | 0.974   | 106.58±30.94        | 86.72±25.82   | 0.630   |
| Triglyceride (mg/dL)                    | 190.56±26.16 | 288.54±34.42 | 0.040   | 198.63±15.56        | 158.75±11.08  | 0.057   |
| <b>Plasma inflammatory proteins</b>     |              |              |         |                     |               |         |
| IgE (µg/mL)                             | 0.40±0.07    | 0.05±0.01    | 0.006   | 0.49±0.09           | 0.35±0.07     | 0.309   |
| IFN-γ (pg/mL)                           | 17.37±3.15   | 7.00±2.45    | 0.022   | 94.51±18.45         | 85.55±14.32   | 0.753   |
| TNF-α (pg/mL)                           | 12.44±8.66   | 5.95±3.93    | 0.511   | 37.59±7.82          | 18.23±2.04    | 0.043   |
| Eotaxin (pg/mL)                         | 20.62±1.15   | 22.57±3.03   | 0.686   | 67.06±13.83         | 50.42±5.59    | 0.198   |
| MCP-1 (pg/mL)                           | 75.40±9.61   | 114.45±31.66 | 0.278   | 96.03±7.76          | 77.91±6.83    | 0.102   |
| IL4 (pg/mL)                             | 54.37±9.26   | 39.62±8.97   | 0.272   | 14.62±7.59          | 15.55±6.36    | 0.926   |
| IL5 (pg/mL)                             | 24.64±6.54   | 4.17±1.36    | 0.033   | 7.37±0.83           | 6.53±0.94     | 0.514   |
| IL13 (pg/mL)                            | 4.85±0.80    | 7.71±1.16    | 0.144   | 2.44±0.76           | 1.50±0.26     | 0.282   |
| TGF-β (ng/mL)                           | 1.57±1.01    | 1.10±1.07    | 0.753   | 2.83±1.02           | 5.40±0.42     | 0.045   |
| <b>BALF cell typing</b>                 |              |              |         |                     |               |         |
| Total Cell in BALF (x10 <sup>4</sup> )  | 12.15±1.22   | 6.42±0.76    | 0.002   | 36.72±6.76          | 9.58±3.04     | 0.003   |
| Macrophage (%)                          | 26.25±4.20   | 96.25±1.45   | <0.001  | 27.22±6.76          | 78.89±3.61    | <0.001  |
| Lymphocyte (%)                          | 22.50±3.27   | 3.13±1.17    | <0.001  | 20.56±3.86          | 16.67±3.44    | 0.462   |
| Eosinophil (%)                          | 51.25±4.50   | 0.63±0.62    | <0.001  | 51.67±6.97          | 3.33±1.44     | <0.001  |
| Neutrophil (%)                          | 0.00±0.00    | 0.00±0.00    | N/A     | 0.56±0.56           | 1.11±0.73     | 0.556   |
| <b>BALF proteins</b>                    |              |              |         |                     |               |         |
| IgE (ng/mL)                             | 35.08±6.78   | 12.32±1.26   | 0.011   | 33.82±8.22          | 38.44±6.95    | 0.674   |
| IFN-γ (pg/mL)                           | 321.33±55.28 | 303.71±65.10 | 0.839   | 231.01±59.56        | 277.98±43.84  | 0.552   |
| TNF-α (pg/mL)                           | 394.77±77.52 | 163.89±21.45 | 0.020   | 400.58±79.12        | 483.02±62.33  | 0.436   |
| Eotaxin (pg/mL)                         | 37.43±2.64   | 29.81±0.88   | 0.054   | 32.21±1.45          | 35.52±1.53    | 0.136   |
| MCP-1 (pg/mL)                           | 28.05±5.58   | 5.09±1.39    | 0.004   | 23.54±4.29          | 34.51±12.35   | 0.448   |
| IL4 (pg/mL)                             | 6.59±1.53    | 4.78±2.48    | 0.544   | 4.63±1.85           | 2.72±0.87     | 0.372   |
| IL5 (pg/mL)                             | 7.79±1.53    | 1.66±0.35    | 0.004   | 2.41±0.29           | 2.20±0.38     | 0.682   |
| IL13 (pg/mL)                            | 33.72±5.31   | 14.65±3.81   | 0.029   | 27.16±5.18          | 30.64±5.31    | 0.644   |
| TGF-β (pg/mL)                           | 343.93±35.51 | 395.02±48.26 | 0.409   | 206.41±29.83        | 201.79±26.44  | 0.912   |

**Supplementary Table III.** Contribution of AAA development on allergic lung inflammation (ALI) in *Apoe*<sup>-/-</sup> mice.

| Variable                                | OVA            |                            | P value | Saline         |                            | P value |
|-----------------------------------------|----------------|----------------------------|---------|----------------|----------------------------|---------|
|                                         | ALI only (n=8) | AAA first, then ALI (n=10) |         | ALI only (n=8) | AAA first, then ALI (n=10) |         |
| <b>Anthropometric parameters</b>        |                |                            |         |                |                            |         |
| Body weight-1 (g)                       | 27.71±0.31     | 27.34±1.30                 | 0.789   | 27.93±0.41     | 27.46±1.04                 | 0.683   |
| Body weight-2 (g)                       | 32.64±0.41     | 32.83±0.97                 | 0.855   | 32.19±0.81     | 32.10±0.63                 | 0.933   |
| SBP-1 (mmHg)                            | 108.25±2.12    | 102.89±5.74                | 0.401   | 110.13±4.01    | 102.89±3.18                | 0.180   |
| SBP-2 (mmHg)                            | 108.38±2.38    | 146.25±9.39                | 0.006   | 109.63±3.47    | 137.11±7.23                | 0.005   |
| DBP-1 (mmHg)                            | 89.50±2.94     | 76.89±4.75                 | 0.042   | 86.00±4.37     | 75.00±3.21                 | 0.063   |
| DBP-2 (mmHg)                            | 89.00±2.70     | 110.13±8.41                | 0.052   | 88.25±3.44     | 97.33±6.97                 | 0.266   |
| <b>AAA lesion analysis</b>              |                |                            |         |                |                            |         |
| AAA size (mm)                           | 1.00±0.05      | 2.71±0.42                  | 0.003   | 1.03±0.05      | 1.49±0.14                  | 0.009   |
| Mortality (%)                           | 0              | 28.57%                     | 0.254   | 0              | 16.67%                     | 0.495   |
| Area (mm <sup>2</sup> )                 | 0.09±0.01      | 1.92±0.48                  | 0.001   | 0.08±0.01      | 0.75±0.21                  | 0.011   |
| Macrophage (% area)                     | 3.31±0.27      | 11.59±0.99                 | <0.001  | 3.05±0.70      | 12.32±1.02                 | <0.001  |
| Mast cell (# per section)               | 0.75±0.53      | 61.00±11.93                | <0.001  | 1.25±0.75      | 16.33±4.30                 | <0.001  |
| CD4 <sup>+</sup> T-cell (# per section) | 0.13±0.13      | 93.56±16.15                | <0.001  | 1.75±0.86      | 31.67±10.06                | <0.001  |
| CD8 <sup>+</sup> T-cell (# per section) | 0.00±0.00      | 54.78±7.34                 | <0.001  | 0.38±0.08      | 18.33±7.99                 | <0.001  |
| MHC-II (% area)                         | 0.04±0.01      | 1.15±0.17                  | <0.001  | 0.12±0.05      | 1.42±0.41                  | 0.009   |
| SMC loss (grade)                        | 1.1±0.01       | 3.09±0.10                  | <0.001  | 1.2±0.01       | 1.97±0.18                  | <0.001  |
| Collagen (grade)                        | 1.70±0.58      | 1.56±0.13                  | 0.815   | 3.42±0.15      | 2.97±0.22                  | 0.112   |
| Elastin frag. (grade)                   | 1.57±0.06      | 2.84±0.15                  | <0.001  | 1.54±0.08      | 2.71±0.19                  | <0.001  |
| Ki67 <sup>+</sup> cell (# per section)  | 1.75±0.53      | 62.22±14.38                | <0.001  | 1.38±0.32      | 19.00±7.19                 | <0.001  |
| Microvessel (# per section)             | 1.25±0.65      | 58.89±18.24                | <0.001  | 2.00±0.41      | 24.22±9.55                 | <0.001  |
| TUNEL <sup>+</sup> cell (# per section) | 1.75±0.80      | 92.78±10.88                | <0.001  | 3.13±1.11      | 61.22±3.17                 | <0.001  |
| <b>Plasma lipid proteins</b>            |                |                            |         |                |                            |         |
| Total cholesterol (mg/dL)               | 218.70±13.81   | 230.82±5.81                | 0.394   | 296.98±24.72   | 271.56±50.21               | 0.659   |
| LDL (mg/dL)                             | 181.56±52.64   | 95.41±21.62                | 0.185   | 168.96±31.49   | 153.09±40.13               | 0.756   |
| HDL (mg/dL)                             | 84.68±38.71    | 106.58±30.94               | 0.678   | 86.22±21.94    | 86.72±25.82                | 0.988   |
| Triglyceride (mg/dL)                    | 190.56±26.16   | 198.63±15.56               | 0.796   | 288.54±34.42   | 158.75±11.08               | 0.006   |
| <b>Plasma inflammatory proteins</b>     |                |                            |         |                |                            |         |
| IgE (µg/mL)                             | 0.40±0.07      | 0.49±0.09                  | 0.483   | 0.05±0.01      | 0.35±0.07                  | 0.007   |
| IFN-γ (pg/mL)                           | 17.37±3.15     | 94.51±18.45                | 0.011   | 7.00±2.45      | 85.55±14.32                | 0.001   |
| TNF-α (pg/mL)                           | 12.44±8.66     | 37.59±7.82                 | 0.397   | 5.95±3.93      | 18.23±2.04                 | 0.004   |
| Eotaxin (pg/mL)                         | 20.62±1.15     | 67.06±13.83                | 0.015   | 22.57±3.03     | 50.42±5.59                 | 0.003   |
| MCP-1 (pg/mL)                           | 75.40±9.61     | 96.03±7.76                 | 0.142   | 114.45±31.66   | 77.91±6.83                 | 0.298   |
| IL4 (pg/mL)                             | 54.37±9.26     | 14.62±7.59                 | 0.005   | 39.62±8.97     | 15.55±6.36                 | 0.047   |
| IL5 (pg/mL)                             | 24.64±6.54     | 7.37±0.83                  | 0.048   | 4.17±1.36      | 6.53±0.94                  | 0.181   |
| IL13 (pg/mL)                            | 4.85±0.80      | 2.44±0.76                  | 0.072   | 7.71±1.16      | 1.50±0.26                  | 0.012   |
| TGF-β (ng/mL)                           | 1.57±1.01      | 2.83±1.02                  | 0.049   | 1.10±1.07      | 5.40±0.42                  | 0.018   |
| <b>BALF cell typing</b>                 |                |                            |         |                |                            |         |
| Total Cell in BALF (x10 <sup>4</sup> )  | 12.15±1.22     | 36.72±6.76                 | 0.006   | 6.42±0.76      | 9.58±3.04                  | 0.339   |
| Macrophage (x10 <sup>4</sup> )          | 3.16±0.54      | 9.41±1.64                  | 0.004   | 6.19±0.75      | 7.89±2.69                  | 0.557   |
| Lymphocyte (x10 <sup>4</sup> )          | 2.84±0.61      | 6.50±0.84                  | 0.003   | 0.20±0.08      | 1.34±0.44                  | 0.032   |
| Eosinophil (x10 <sup>4</sup> )          | 6.25±0.88      | 20.70±5.50                 | 0.030   | 0.03±0.03      | 0.16±0.07                  | 0.122   |
| Neutrophil (x10 <sup>4</sup> )          | 0.00±0.00      | 0.11±0.11                  | 0.346   | 0.00±0.00      | 0.19±0.15                  | 0.251   |
| <b>BALF proteins</b>                    |                |                            |         |                |                            |         |
| IgE (ng/mL)                             | 35.08±6.78     | 33.82±8.22                 | 0.907   | 12.32±1.26     | 38.44±6.95                 | 0.005   |
| IFN-γ (pg/mL)                           | 321.33±55.28   | 231.01±59.56               | 0.300   | 303.71±65.10   | 277.98±43.84               | 0.748   |
| TNF-α (pg/mL)                           | 394.77±77.52   | 400.58±79.12               | 0.958   | 163.89±21.45   | 483.02±62.33               | 0.001   |
| Eotaxin (pg/mL)                         | 37.43±2.64     | 32.21±1.45                 | 0.111   | 29.81±0.88     | 35.52±1.53                 | 0.006   |
| MCP-1 (pg/mL)                           | 28.05±5.58     | 23.54±4.29                 | 0.533   | 5.09±1.39      | 34.51±12.35                | 0.060   |
| IL4 (pg/mL)                             | 6.59±1.53      | 4.63±1.85                  | 0.426   | 4.78±2.48      | 2.72±0.87                  | 0.455   |
| IL5 (pg/mL)                             | 7.79±1.53      | 2.41±0.29                  | 0.009   | 1.66±0.35      | 2.20±0.38                  | 0.310   |
| IL13 (pg/mL)                            | 33.72±5.31     | 27.16±5.18                 | 0.448   | 14.65±3.81     | 30.64±5.31                 | 0.028   |
| TGF-β (pg/mL)                           | 343.93±35.51   | 206.41±29.83               | 0.011   | 395.02±48.26   | 201.79±26.44               | 0.004   |
